# Supplementary material for: Dyeing of Tussah Silk with Reactive Dyes: Dye Selection, Dyeing Conditions, Dye Fixation Characteristics, and Comparison with Mulberry Silk
Source: MDPI journal article supplement (doi:10.3390/molecules29051151), 2024-03-05
Supplement: s1 [file s1]

## Supplementary Materials

### Dyeing of Tussah Silk with Reactive Dyes: Dye Selection,

### Dyeing Conditions, Dye Fixation Characteristics, and

### Comparison with Mulberry Silk

Yingjie Yu <sup>1,2,3,4</sup> and Rencheng Tang <sup>1,2,3,4,\*</sup>

<sup>1</sup> College of Textile and Clothing Engineering, North Campus, Soochow University, Suzhou 215021, China

<sup>2</sup> China National Textile and Apparel Council Key Laboratory of Natural Dyes, Dushuhu Campus, Soochow University, Suzhou 215123, China

<sup>3</sup> Jiangsu Engineering Research Center of Textile Dyeing and Printing for Energy Conservation, Discharge Reduction and Cleaner Production (ERC), Dushuhu Campus, Soochow University, Suzhou 215123, China

<sup>4</sup> National Engineering Laboratory for Modern Silk, Dushuhu Campus, Soochow University, Suzhou 215123, China

\* Correspondence: tangrencheng@suda.edu.cn

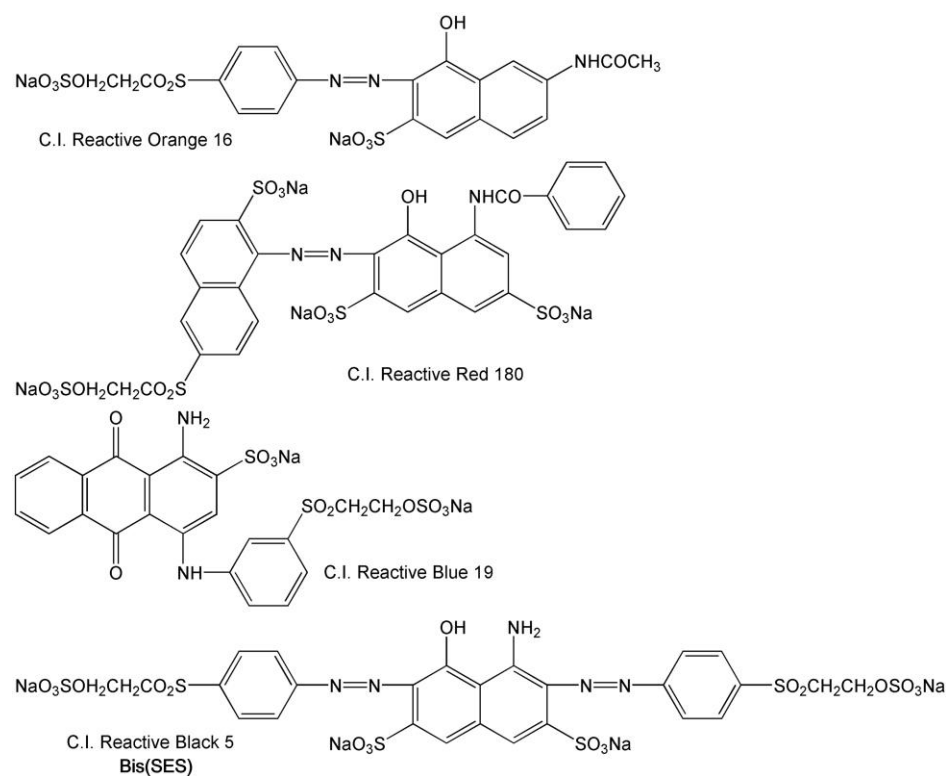

(1) SES dyes

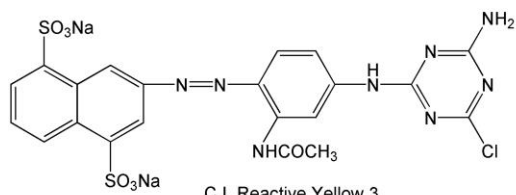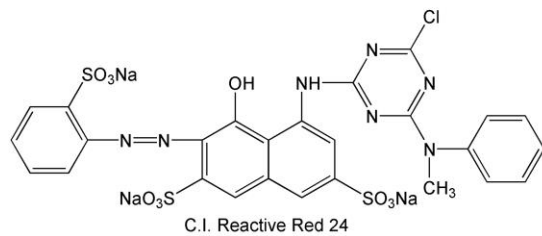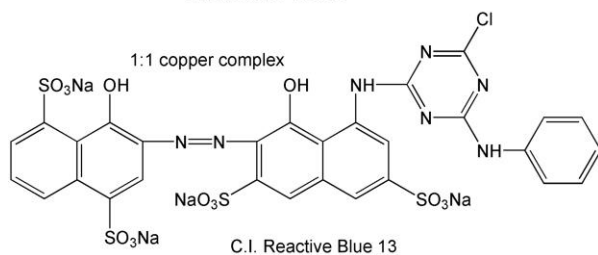

## (2) MCT dyes

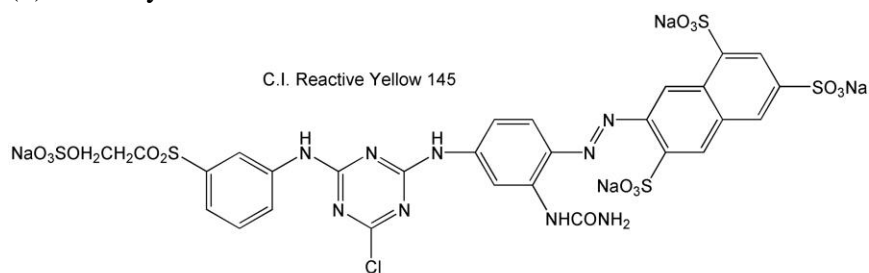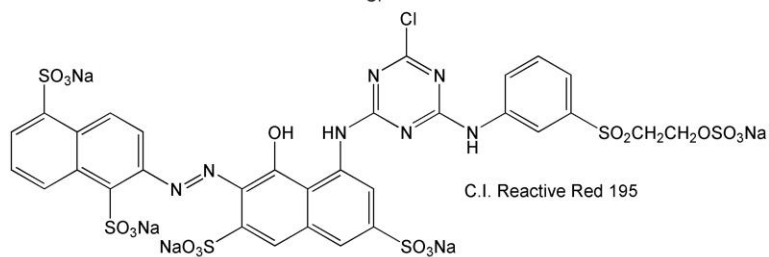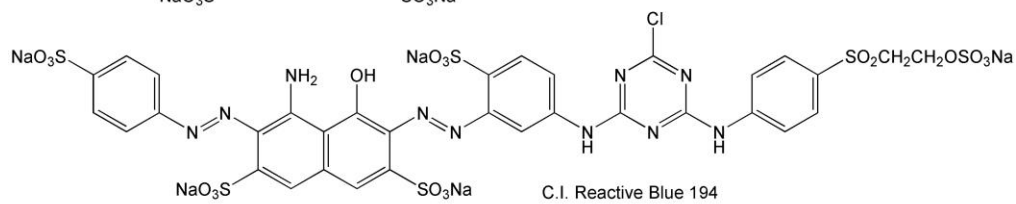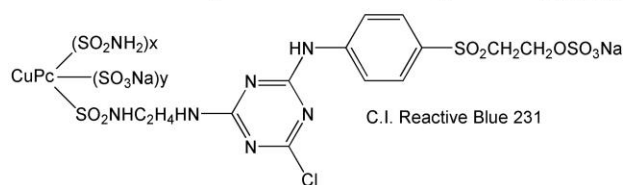

## (3) SES/MCT dyes



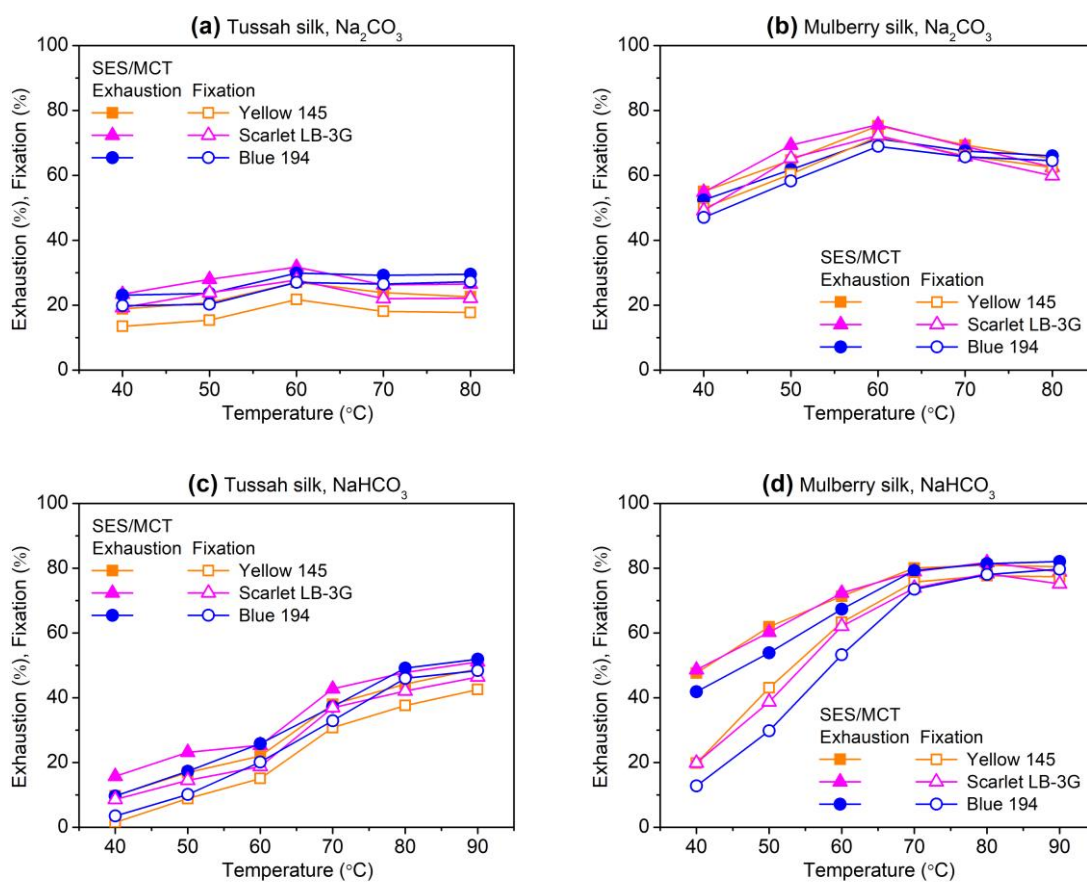

**Figure S2.** Exhaustion and fixation of SES/MCT dyes on tussah and mulberry silks dyed at various constant temperatures with the addition of an alkali (3%owf dye, 60 g/L Na<sub>2</sub>SO<sub>4</sub>, and 3 g/L Na<sub>2</sub>CO<sub>3</sub> or NaHCO<sub>3</sub>; soaping at 90 °C for 20 min).

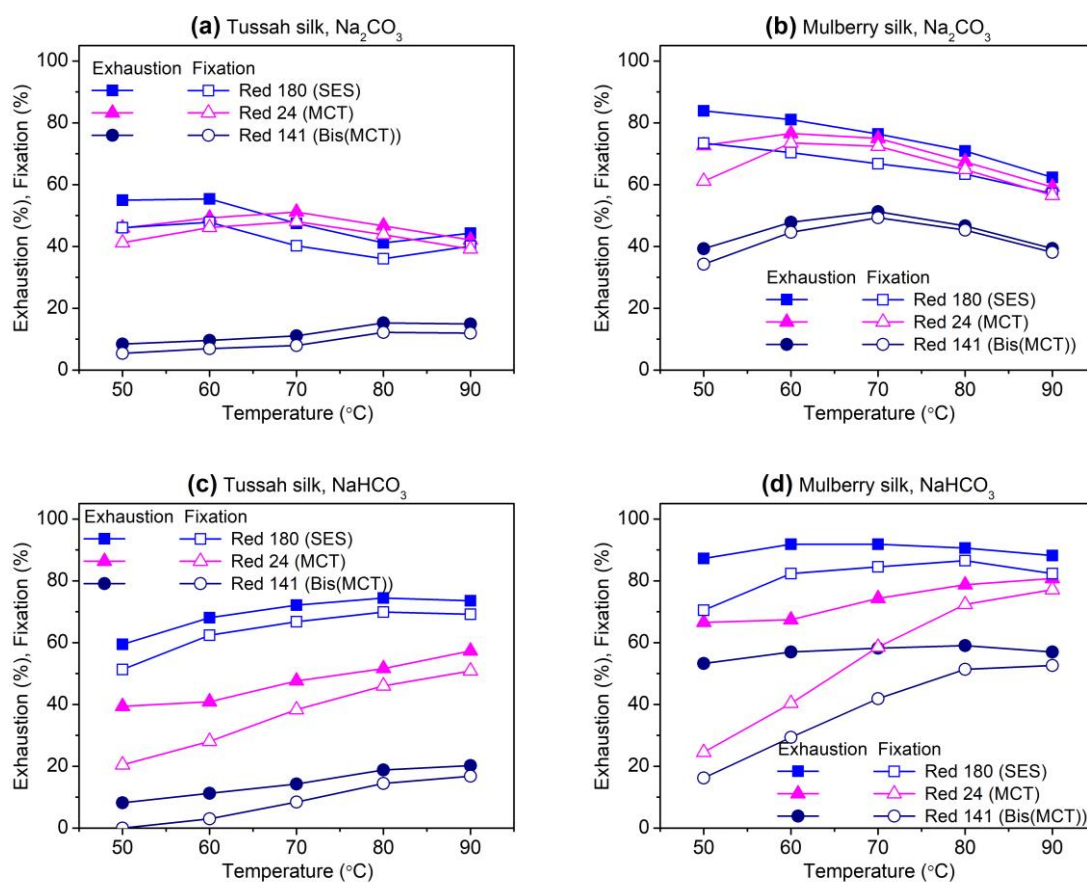

**Figure S3.** Exhaustion and fixation of SES, MCT, and Bis(MCT) red dyes on tussah and mulberry silks dyed at various constant temperatures with the addition of an alkali (3%owf dye, 60 g/L  $\text{Na}_2\text{SO}_4$ , and 3 g/L  $\text{Na}_2\text{CO}_3$  or  $\text{NaHCO}_3$ ; soaping at 90 °C for 20 min).

Before soaping

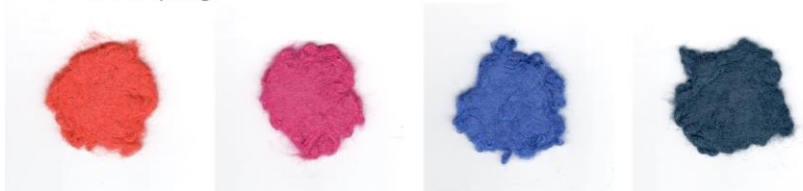

After soaping

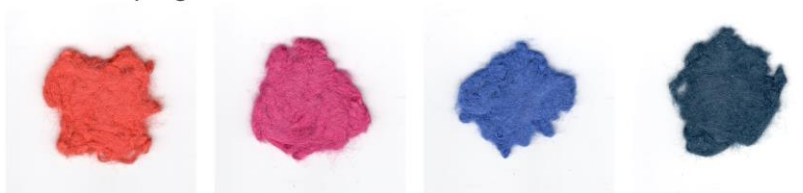

Orange 16

Red 180

Blue 19

Black 5

Tussah silk dyed at 90 °C with the use of  $\text{NaHCO}_3$

Before soaping

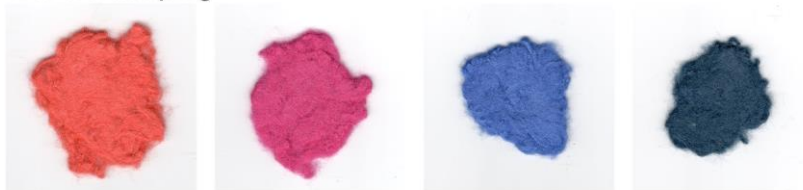

After soaping

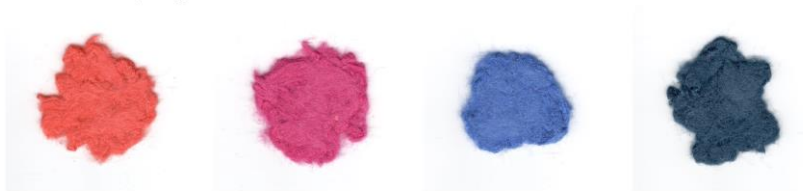

Orange 16

Red 180

Blue 19

Black 5

Tussah silk dyed at 90 °C with no use of  $\text{NaHCO}_3$

**Figure S4.** Images of dyed tussah silk samples before and after the soaping color fastness test (dyeing was carried out with 4%owf SES dyes at 90 °C in the presence and absence of  $\text{NaHCO}_3$ )
